# Supplementary material for: Randomized phase II study of weekly carfilzomib 70 mg/m2 and dexamethasone with or without cyclophosphamide in relapsed and/or refractory multiple myeloma patients
Source: PubMed Central journal article supplement — Haematologica. 2023 Apr 27;108(10):2753–63. doi: 10.3324/haematol.2022.282490 (PMC10542845; doi:10.3324/haematol.2022.282490), 2023-04-27
Supplement: 2022_282490_PUERTAS_SUPPL.pdf [file 2022_282490_PUERTAS_SUPPL.pdf]

# Randomized phase II study of weekly carfilzomib 70 mg/m<sup>2</sup> and dexamethasone with or without cyclophosphamide in relapsed and/or refractory multiple myeloma patients

Borja Puertas,<sup>1\*</sup> Verónica González-Calle,<sup>1\*</sup> Anna Sureda,<sup>2</sup> María José Moreno,<sup>3</sup> Albert Oriol,<sup>4</sup> Esther González,<sup>5</sup> Laura Rosiñol,<sup>6</sup> Jordi López,<sup>7</sup> Fernando Escalante,<sup>8</sup> Joaquín Martínez-Lopez,<sup>9</sup> Estrella Carrillo,<sup>10</sup> Esther Clavero,<sup>11</sup> Rafael Ríos-Tamayo,<sup>12</sup> Beatriz Rey-Bua,<sup>1</sup> Ana Pilar González-Rodríguez,<sup>13</sup> Victoria Dourdil,<sup>14</sup> Felipe de Arriba,<sup>15</sup> Sonia González,<sup>16</sup> Jaime Pérez-de-Oteyza,<sup>17</sup> Miguel T. Hernández,<sup>18</sup> Aránzazu García-Mateo,<sup>19</sup> Joan Bargay,<sup>20</sup> Joan Bladé,<sup>6</sup> Juan José Lahuerta,<sup>9</sup> Jesús F. San Miguel,<sup>21</sup> Enrique M. Ocio<sup>22</sup> and María-Victoria Mateos<sup>1</sup>

<sup>1</sup>Hematology Department, University Hospital of Salamanca/IBSAL/Cancer Research Center-IBMCC (USAL-CSIC), CIBERONC, Salamanca; <sup>2</sup>Hematology Department, Institut Català D'Oncologia L'Hospitalet, Barcelona; <sup>3</sup>Hematology Department, Hospital Clínico Universitario Virgen De La Arrixaca, Murcia; <sup>4</sup>Hematology Department, Institut Josep Carreras and Institut Català d'Oncologia, Hospital Germans Trias i Pujol, Badalona; <sup>5</sup>Hematology Department, Hospital De Cabueñes, Gijón; <sup>6</sup>Department of Hematology, IDIBAPS, Hospital Clinic, Barcelona; <sup>7</sup>Hematology Department, Hospital De La Santa Creu i Sant Pau, Barcelona; <sup>8</sup>Department of Hematology, University Hospital of Leon, Leon; <sup>9</sup>Hematology Department, Hospital Universitario 12 de Octubre, Universidad Complutense, CNIO, Madrid; <sup>10</sup>Department of Hematology, University Hospital Virgen del Rocío, Instituto de Biomedicina de Sevilla (IBIS/CISC), Sevilla; <sup>11</sup>Hematology Department, Hospital Universitario Virgen De Las Nieves, Granada; <sup>12</sup>Hospital Universitario Puerta de Hierro Majadahonda, Madrid; <sup>13</sup>Hematology Department, Hospital Universitario Central De Asturias, Oviedo; <sup>14</sup>Hematology Department, Hospital Clínico Universitario Lozano Blesa, IIS Aragón, Zaragoza; <sup>15</sup>Servicio de Hematología y Oncología Médica, Hospital Universitario Morales Meseguer, IMIB-Pascual Parrilla, Universidad de Murcia, Murcia; <sup>16</sup>Hematology Department, Complejo Hospitalario Universitario De Santiago, Santiago de Compostela; <sup>17</sup>Hematology Department, Hospital Universitario Madrid Sanchinarro, Madrid; <sup>18</sup>Hematology Department, Hospital Universitario De Canarias, San Cristóbal de La Laguna, Tenerife; <sup>19</sup>Hematology Department, Hospital General De Segovia, Segovia; <sup>20</sup>Hematology Department, H. Universitario Son Llàtzer, IdISBa, Mallorca; <sup>21</sup>Hematology Department, Clínica Universidad de Navarra, CIMA, IDISNA, CIBERONC, Pamplona; <sup>22</sup>Hematology Department, Hospital Universitario Marqués De Valdecilla (IDIVAL), Universidad De Cantabria, Santander, Spain

\*BP and VGC contributed equally as first authors.

**Correspondence:** M.V. Mateos  
mvmateos@usal.es

**Received:** November 29, 2022.  
**Accepted:** April 17, 2023.  
**Early view:** April 27, 2023.

<https://doi.org/10.3324/haematol.2022.282490>

©2023 Ferrata Storti Foundation

Published under a CC BY-NC license

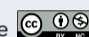

### **Supplementary data legends**

**Table S1.** Subsequent antimyeloma therapies.

**Table S2.** Adverse events: main cause of dose delay and dose reduction.

**Figure S1.** Progression-free survival in patients who achieved MRD negative.

**Figure S2.** Progression-free survival 2.

**Table S1.** Subsequent antimyeloma therapies.

|                                 |                      | <b>KCd arm<br/>(N=49)</b> | <b>Kd arm<br/>(N=65)</b> |
|---------------------------------|----------------------|---------------------------|--------------------------|
| Daratumumab-based combinations  | Daratumumab alone    | 2                         | 2                        |
|                                 | D-Rd                 | 23                        | 31                       |
|                                 | D-Vd                 | 6                         | 5                        |
|                                 | D-Pd                 | 3                         | 4                        |
|                                 | D-Id                 | 0                         | 1                        |
|                                 | D-SVd                | 0                         | 1                        |
| Pomalidomide-based combinations | PCd                  | 2                         | 5                        |
|                                 | Pd                   | 0                         | 1                        |
| BCMA-targeted therapy           | Belantamab mafodotin | 1                         | 1                        |
|                                 | CAR T-cells          | 1                         | 4                        |
| Alkylating agents               | Polychemotherapy     | 1                         | 1                        |
|                                 | Meflufen             | 1                         | 0                        |
| Other combinations              | CELMoDs              | 0                         | 1                        |
|                                 | VRd                  | 0                         | 1                        |
|                                 | Rd                   | 7                         | 7                        |
|                                 | Kd                   | 1                         | 0                        |
|                                 | RT                   | 1                         | 0                        |

Abbreviations: C: cyclophosphamide; CAR: chimeric antigenic receptor; CELMoDs: cereblon E3 ligase modulators; D: daratumumab; d: dexamethasone; I: iberdomide; K: carfilzomib; P: pomalidomide; R: lenalidomide; RT: radiotherapy; S: selinexor; V: bortezomib.

**Table S2.** Adverse events: main cause of dose delay and dose reduction.

|                                         | <b>KCD<br/>(N=97)</b> |                | <b>KD<br/>(N=100)</b> |                |
|-----------------------------------------|-----------------------|----------------|-----------------------|----------------|
|                                         | Dose delay            | Dose reduction | Dose delay            | Dose reduction |
| <b>Hematological adverse events</b>     |                       |                |                       |                |
| Anemia                                  | 1%                    | 0%             | 3%                    | 0%             |
| Neutropenia                             | 8.2%                  | 0%             | 1%                    | 1%             |
| Thrombocytopenia                        | 1%                    | 0%             | 4%                    | 0%             |
| <b>Non-hematological adverse events</b> |                       |                |                       |                |
| Sepsis                                  | 2%                    | 0%             | 0%                    | 0%             |
| Upper respiratory tract infection       | 12.4%                 | 1%             | 12%                   | 1%             |
| Pneumonia                               | 3.1%                  | 0%             | 5%                    | 0%             |
| Other infections                        | 5.2%                  | 0%             | 7%                    | 0%             |
| Atrial fibrillation                     | 0%                    | 0%             | 1%                    | 0%             |
| Arterial hypertension                   | 5.2%                  | 1%             | 2%                    | 9%             |
| Cardiac failure                         | 2%                    | 2.1%           | 1%                    | 3%             |
| Dyspnoea                                | 2%                    | 2.1%           | 1%                    | 1%             |
| Pulmonary hypertension                  | 0%                    | 0%             | 0%                    | 1%             |
| Nausea                                  | 0%                    | 1%             | 0%                    | 0%             |
| Diarrhea                                | 6.2%                  | 1%             | 2%                    | 0%             |
| Mucositis                               | 2%                    | 0%             | 0%                    | 0%             |
| Dyspepsia                               | 0%                    | 1%             | 0%                    | 0%             |
| Acute renal failure                     | 1%                    | 0%             | 3%                    | 1%             |
| Peripheral neuropathy                   | 1%                    | 0%             | 1%                    | 0%             |
| Anorexy                                 | 1%                    | 0%             | 0%                    | 0%             |
| Asthenia                                | 6.2%                  | 5.2%           | 0%                    | 2%             |
| Non-infectious fever                    | 1%                    | 0%             | 0%                    | 0%             |

KCd: Carfilzomib, cyclophosphamide and dexamethasone; Kd: Carfilzomib and dexamethasone

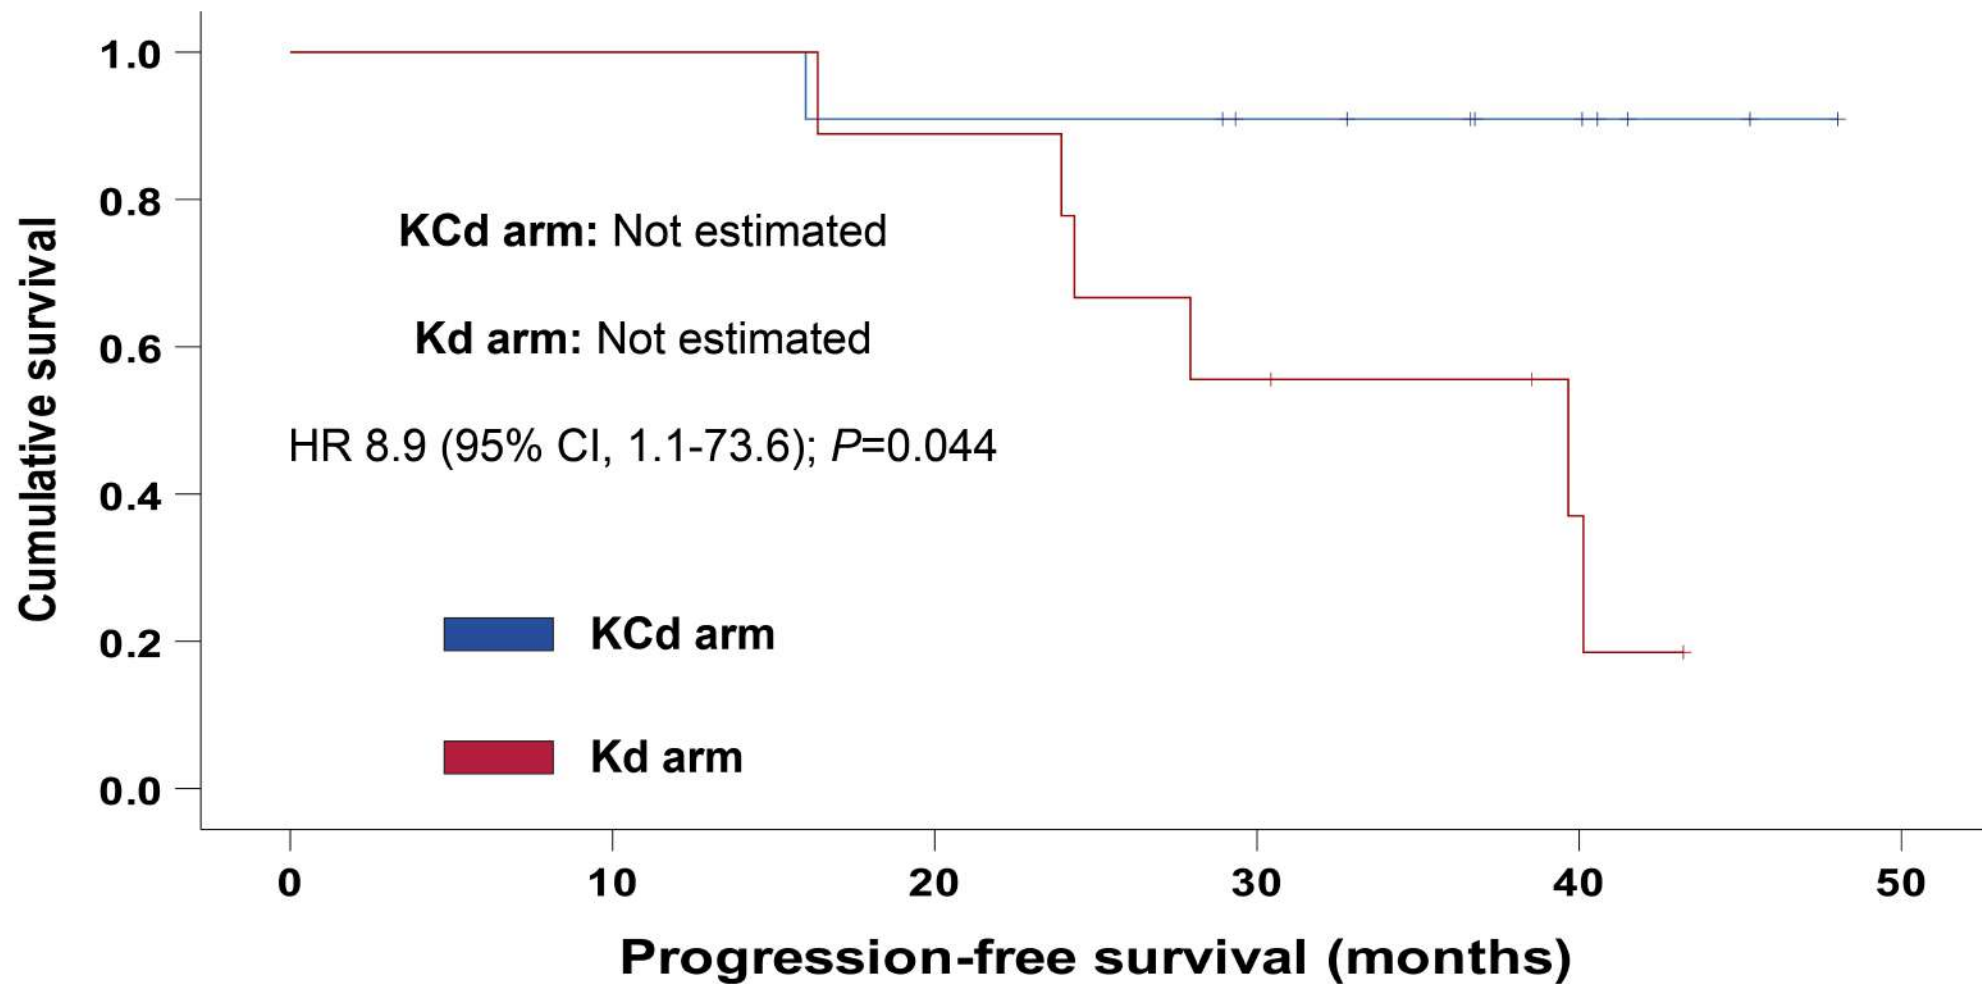

**Figure S1.** Progression-free survival in patients who achieved minimal residual disease negative.

Abbreviations: CI: confidence interval; HR: hazard ratio.

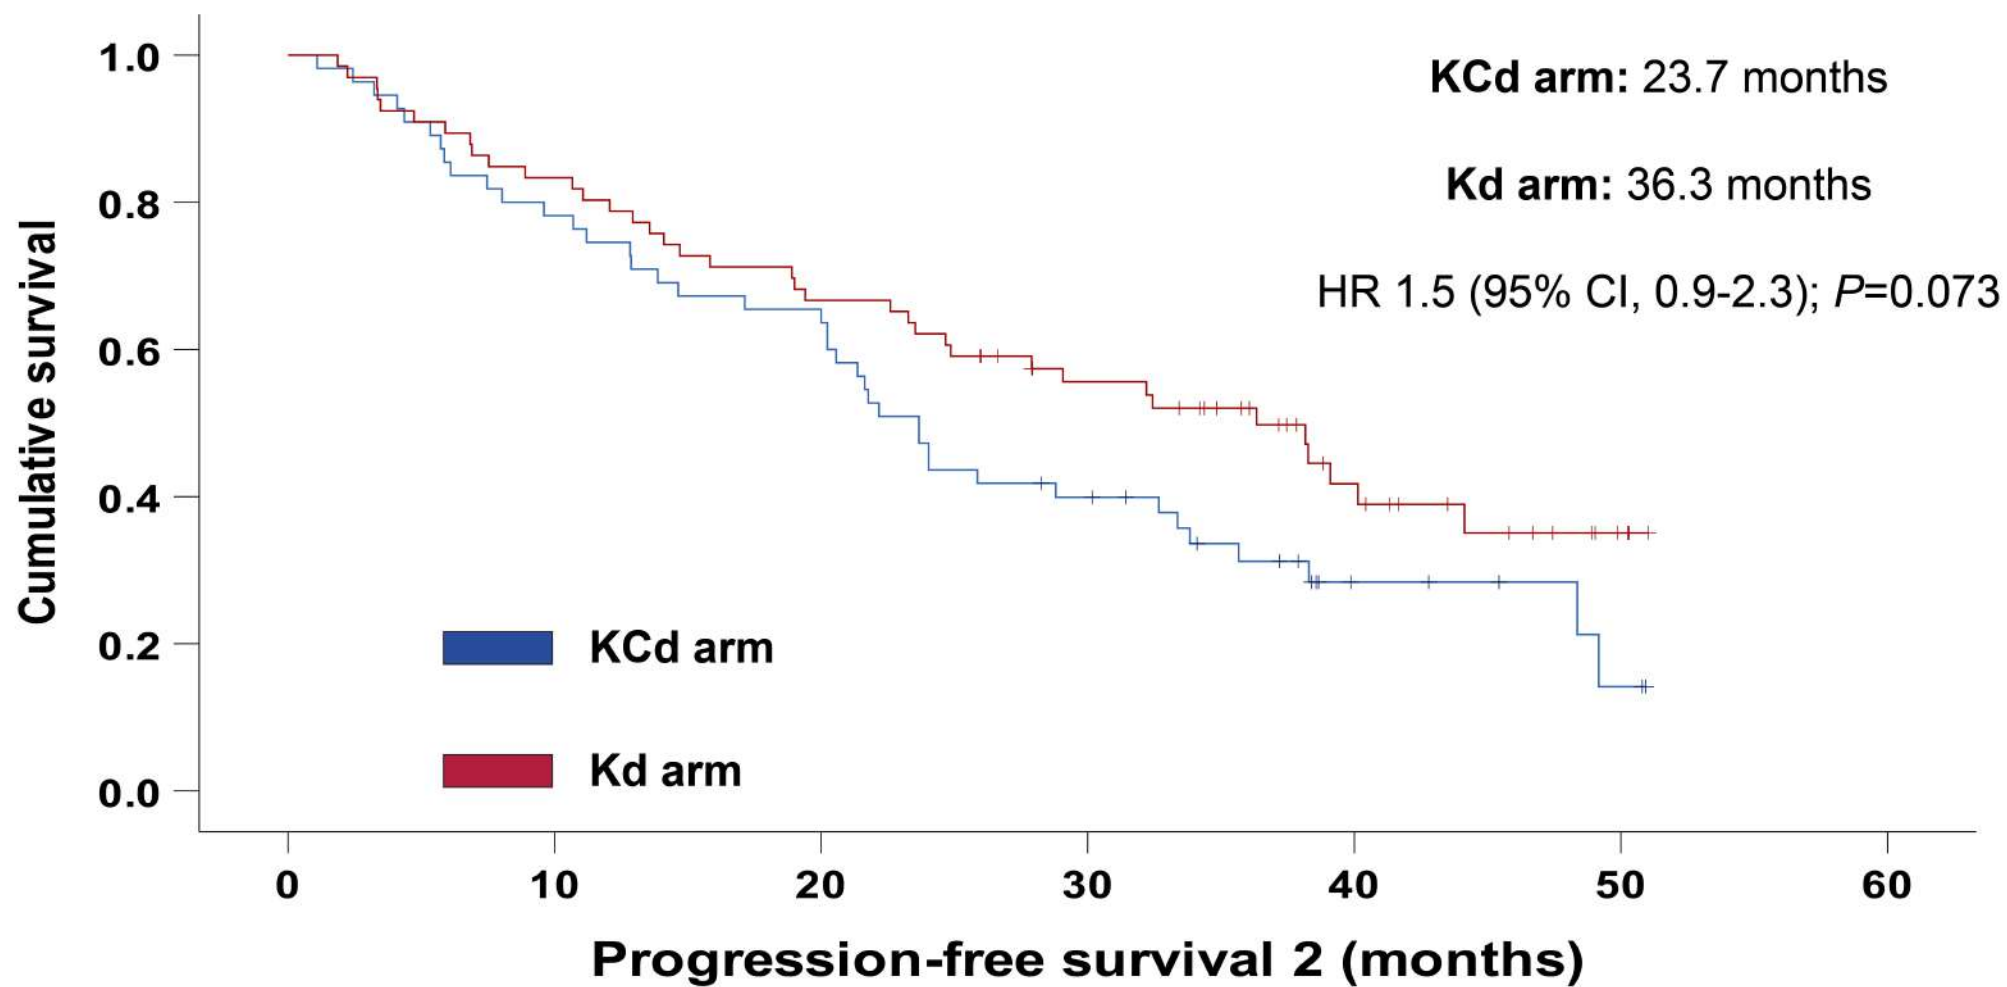

**Figure S2.** Progression-free survival 2.

Abbreviations: CI: confidence interval; HR: hazard ratio.
